# Supplementary material
Source: PubMed Central journal article supplement (PMC9276765)
Supplement: 41416_2022_1771_MOESM1_ESM.pdf [file 41416_2022_1771_MOESM1_ESM.pdf]

## Online-only Supplementary Data

### **The impact of overweight and obesity on the risk of hepatocellular carcinoma: prospective cohort study in over 14 million Korean adults**

**Baek Gyu Jun**, MD, PhD, Sanggye Paik Hospital, Inje University College of Medicine, Republic of Korea; **Moonho Kim**, MD, MSc, Department of Hematology and Oncology, Gangneung Asan Hospital, University of Ulsan College of Medicine, Republic of Korea; **Hwang Sik Shin**, MD, PhD, Department of Family Medicine, Soonchunhyang University College of Medicine, Republic of Korea; **Jee-Jeon Yi**, PhD, Institute for Occupational and Environmental Health, Catholic Kwandong University, Republic of Korea; **Sang-Wook Yi**, MD, PhD, Department of Preventive Medicine and Public Health, Catholic Kwandong University College of Medicine, Republic of Korea

Correspondence: Sang-Wook Yi, MD, PhD, Department of Preventive Medicine and Public Health, Catholic Kwandong University College of Medicine, Beomil-ro 579-beongil 24, Gangneung, Gangwon-do, 25601, Republic of Korea; Tel: +82-33-649-7468; Fax +82-33-641-1074. e-mail: [flyhigh@cku.ac.kr](mailto:flyhigh@cku.ac.kr)

**Figure S1. Study flow chart**

**Figure S2. Distribution of body mass index (BMI) by sex and age.**

**Figure S3. HRs across 11 categories of BMI for HCC incidence.**

**Figure S4. HRs across 13 categories of BMI for HCC incidence (with categories 31-32.9, 33-34.9, and  $\geq 35.0 \text{ kg/m}^2$ ).**

**Figure S5. HRs for HCC incidence by age using spline analysis (5 knots).**

**Figure S6. HRs for HCC incidence by age using spline analysis (3 knots).**

**Figure S7. HRs across 11 categories of BMI for HCC incidence according to adjusted variables.**

**Figure S8. HRs per each  $5 \text{ kg/m}^2$  increase in BMI for HCC incidence according to adjusted variables in individuals with  $\text{BMI} \geq 25 \text{ kg/m}^2$**

**Table S1. HRs for HCC incidence across 11 BMI categories (Including numerical version of Figures 1)**

**Table S2. HRs for HCC incidence across 7 BMI categories according to sex and age (Including numerical version of Figure 3).**

**Table S3. HRs per each  $5 \text{ kg/m}^2$  increase in BMI for HCC incidence by BMI range, age, and sex (including Table 2).**

- The National Health Insurance Service (NHIS) provides mandatory health insurance for 97% of the Korean population and nationwide biennial health screening.
- Clinical chemistry and anthropometric and blood pressure measurement were performed, and information on smoking status, alcohol use, physical activity, and history of various diseases was collected via a questionnaire, during each biennial health screenings.
- The health examinations and data collection followed a standard protocol documented by the Ministry of Health and Welfare.

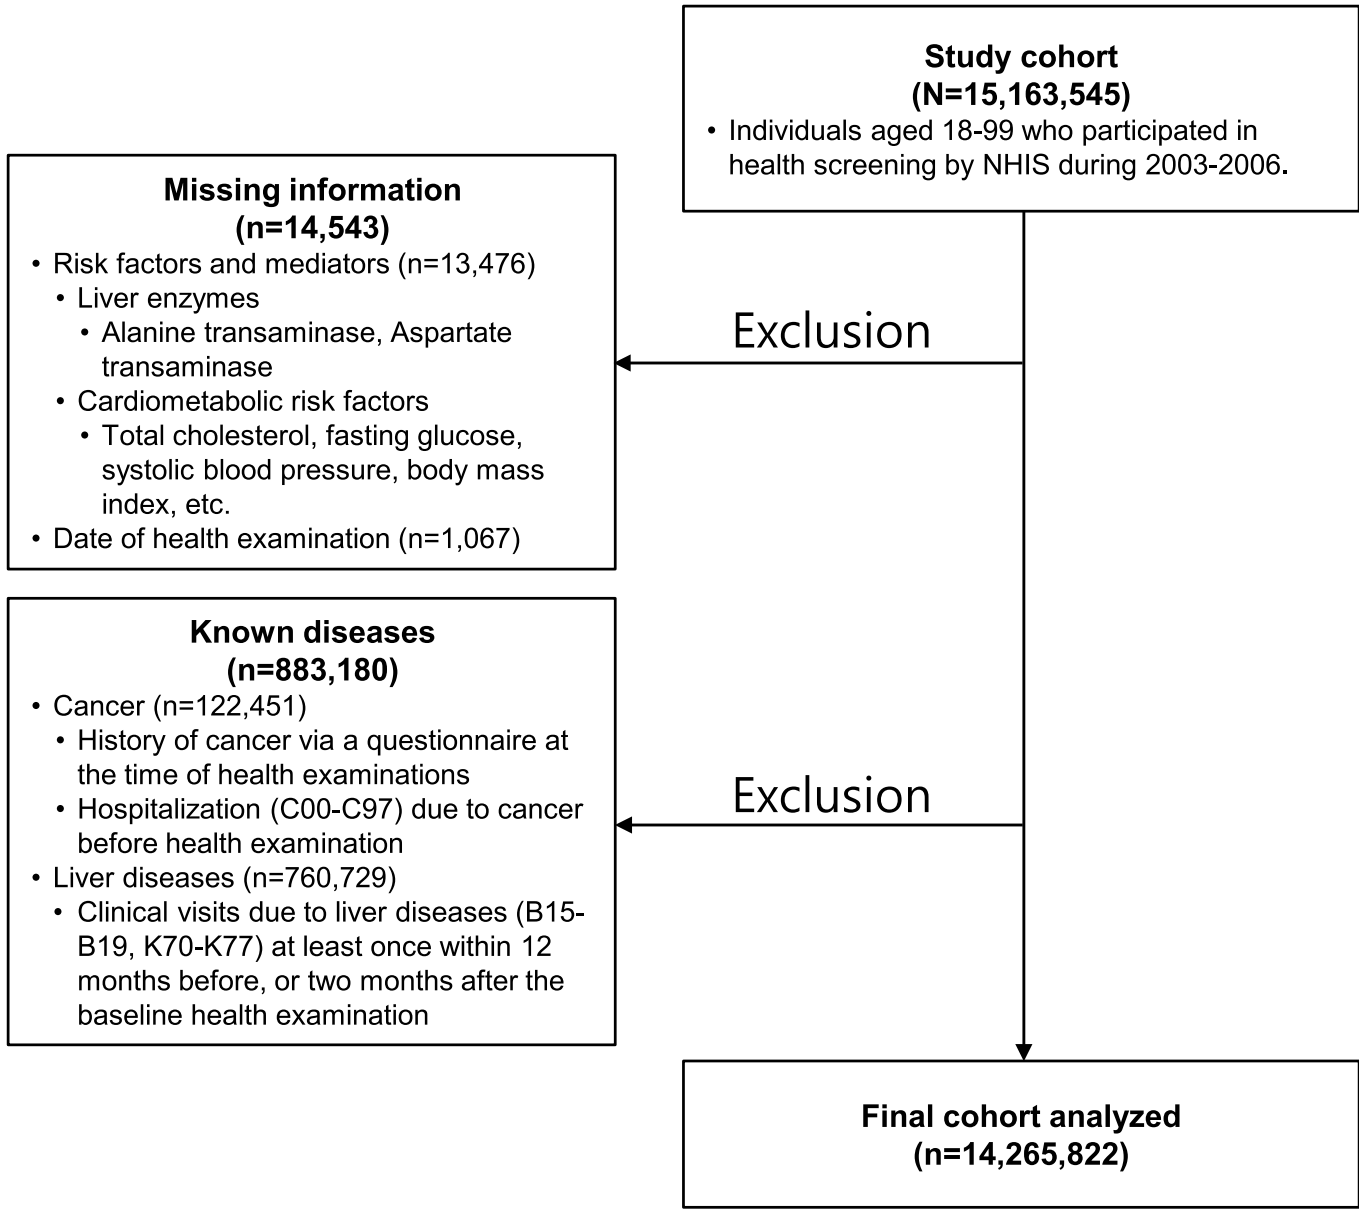

**Figure S1. Study flow chart**

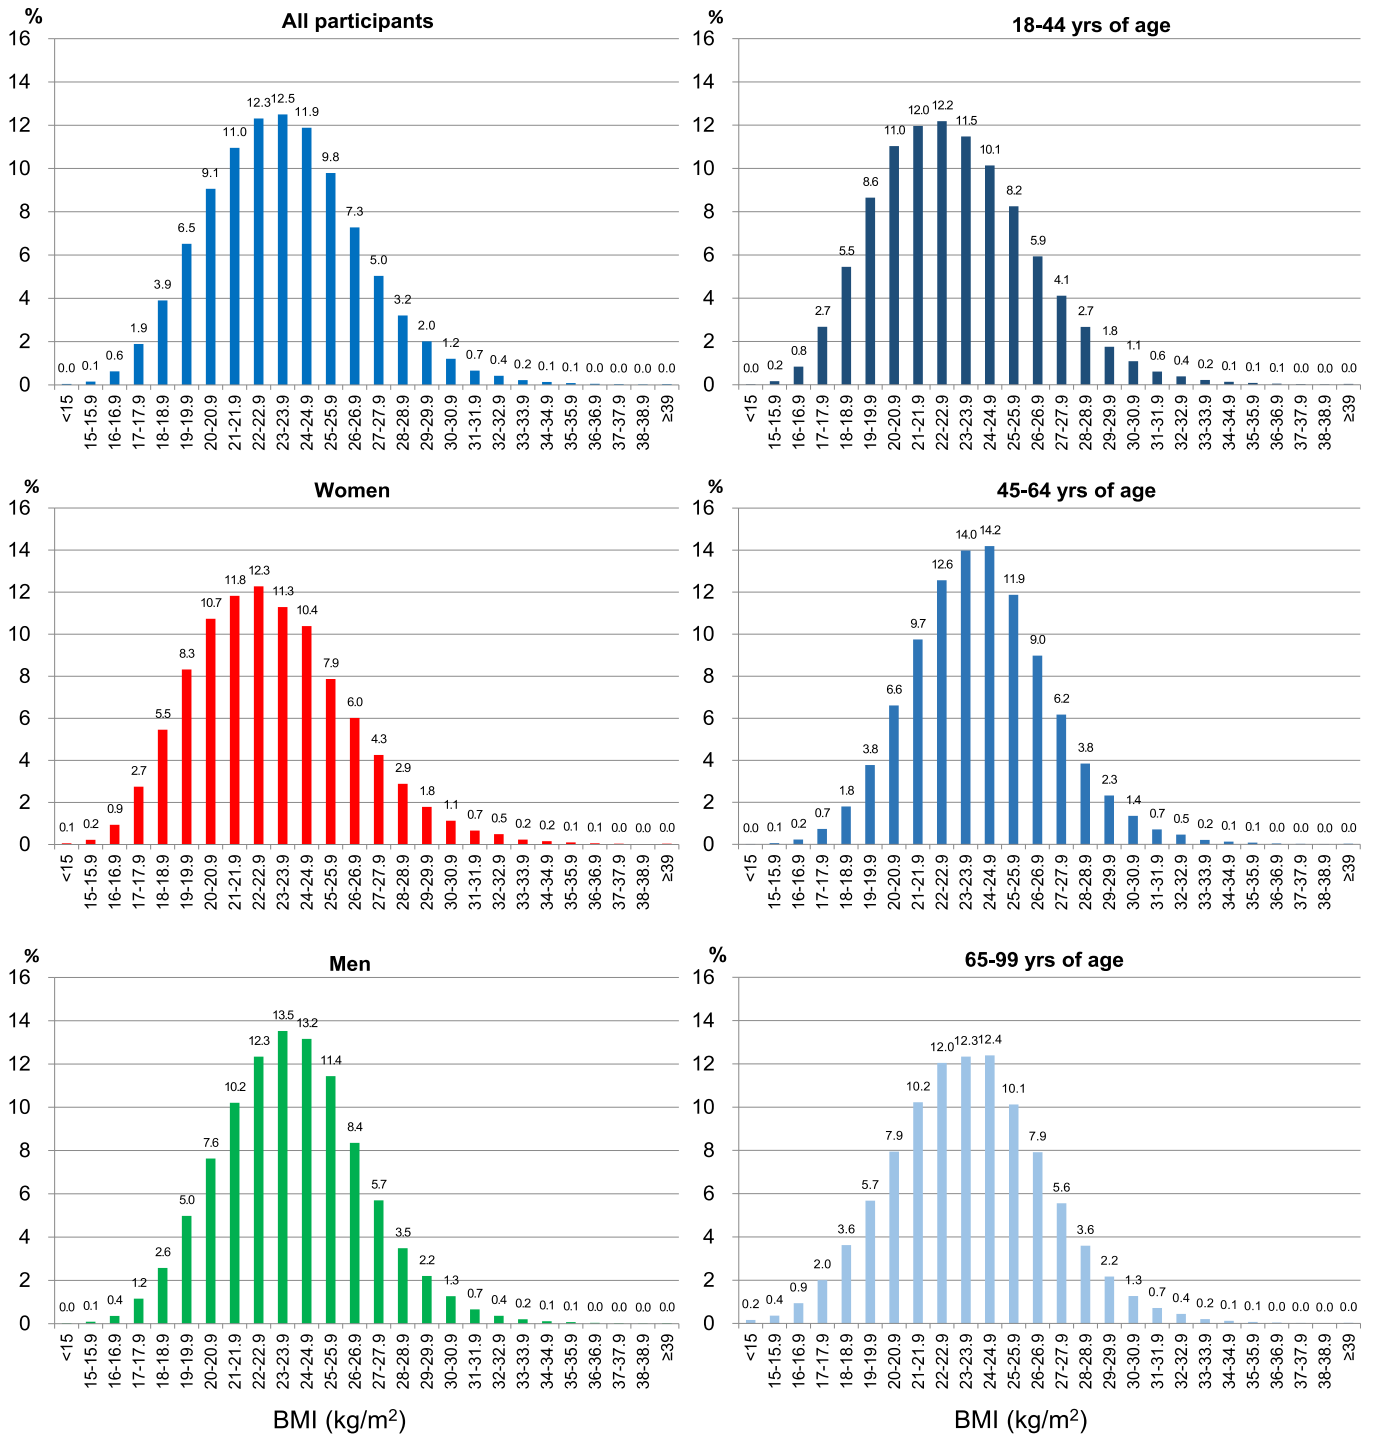

Figure S2. Distribution of body mass index (BMI) by sex and age.

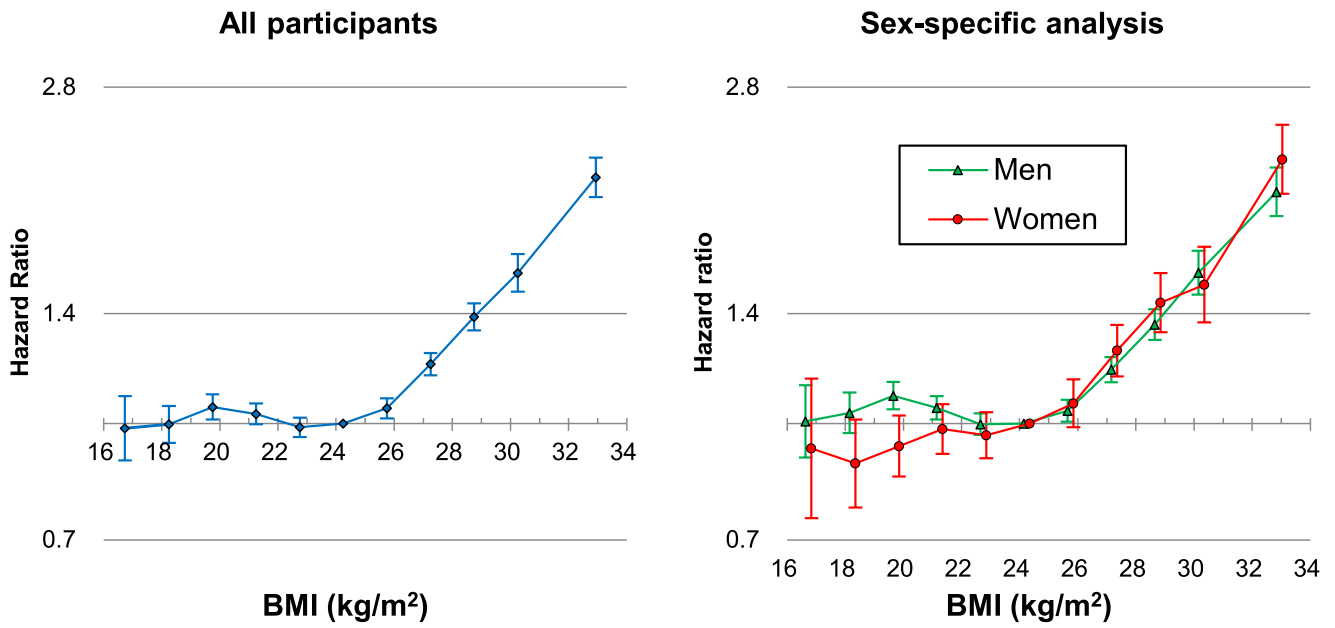

**Figure S3. HRs across 11 categories of BMI for HCC incidence.**

BMI categories (kg/m<sup>2</sup>, <17.5, 17.5-18.9 to 29.5-30.9 by 1.5, ≥31.0, 23.5-24.9 as reference). The midpoint was used as a representative value of each BMI category, except both ends (16.7 and 32.9) for which the median was used. HRs and 95% confidence intervals were calculated using Cox proportional hazard models with adjustment for sex (for all participants only), age at baseline, household income, smoking status, alcohol use, and physical activity. BMI, body mass index; HCC, hepatocellular carcinoma, HR, hazard ratio.

All participants

Sex-specific analysis

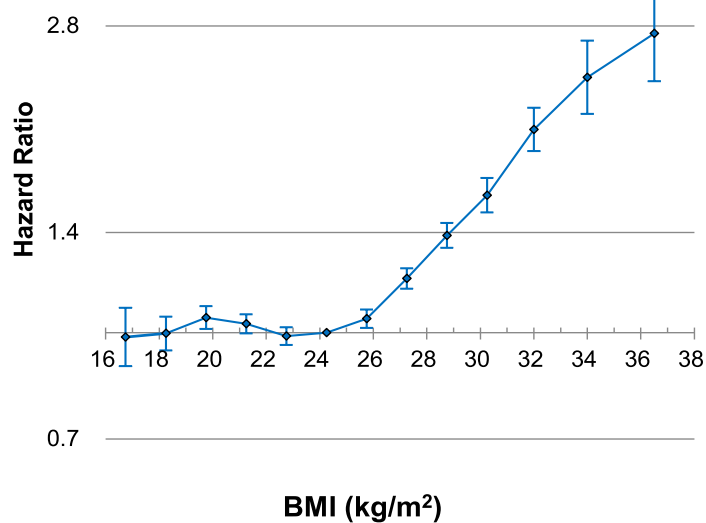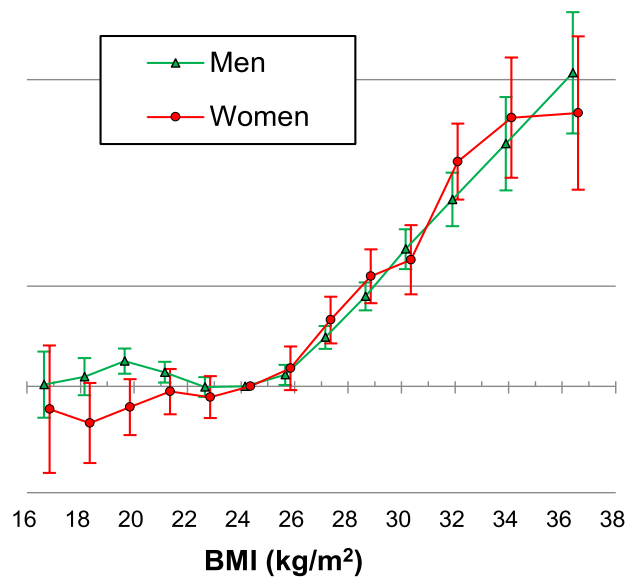

Figure S4. HRs across 13 categories of BMI for HCC incidence.

BMI categories (kg/m<sup>2</sup>, <17.5, 17.5-18.9 to 29.5-30.9 by 1.5, 31-32.9, 33-34.9, and ≥35.0, 23.5-24.9 as reference). The midpoint was used as a representative value of each BMI category, except both ends (16.7 and 36.5) for which the median was used. HRs and 95% confidence intervals were calculated using Cox proportional hazard models with adjustment for the same variables as in Figure S3. BMI, body mass index; HCC, hepatocellular carcinoma, HR, hazard ratio.

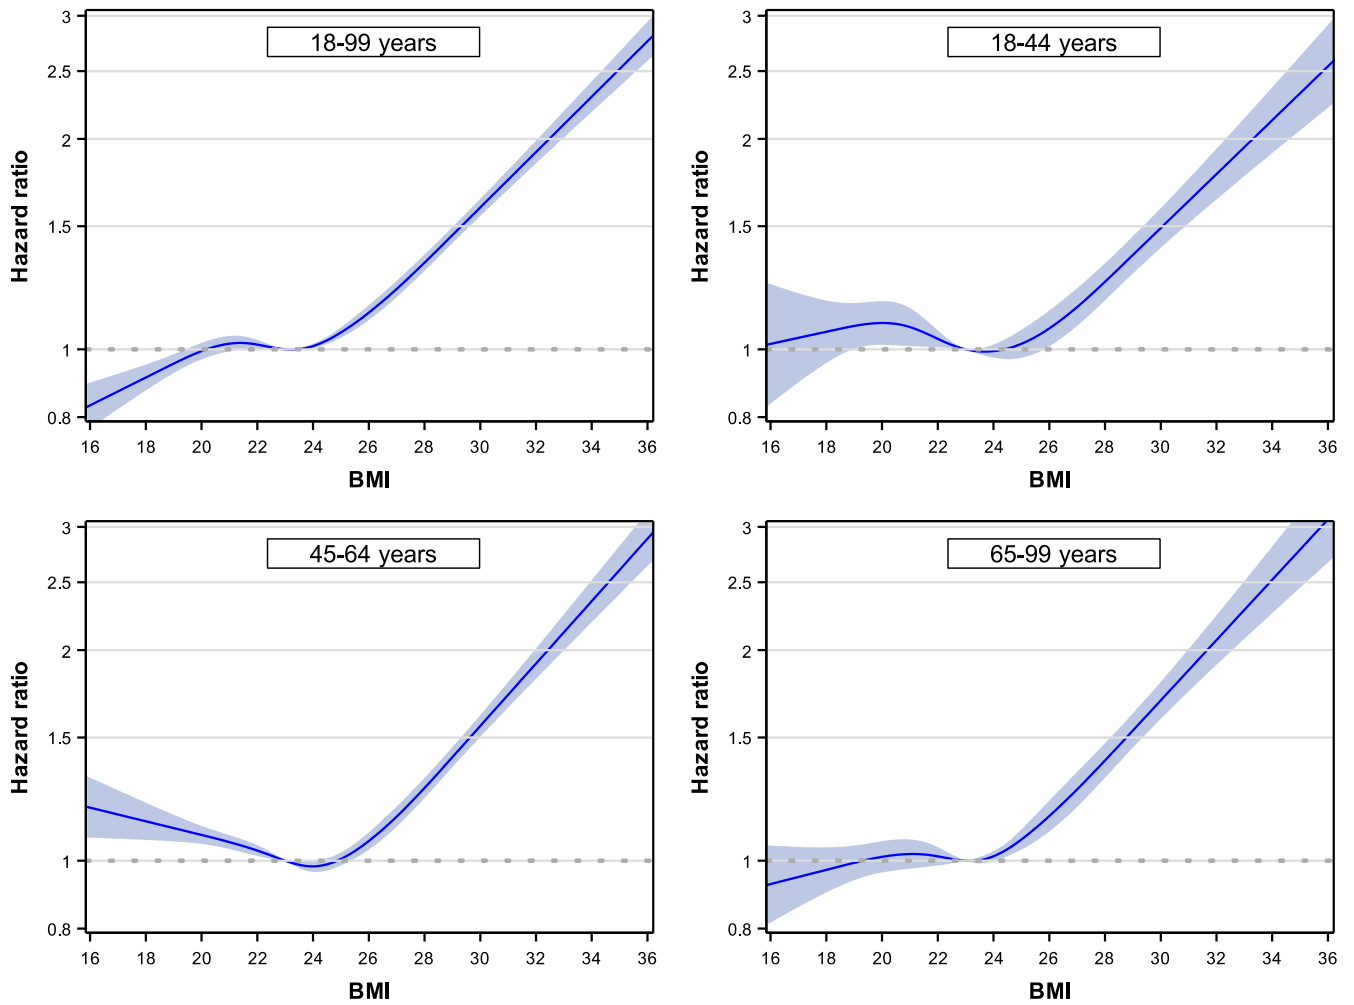

**Figure S5. HRs\* for HCC incidence by age using spline analysis (5 knots).**

Restricted cubic splines of BMI with predefined 5 knots (5th, 27.5th, 50th, 72.5th, and 95th percentile) and 23 kg/m<sup>2</sup> as a reference were used. Hazard ratios and 95% CIs were calculated using Cox proportional hazards models after adjustment for the same variables as in Figure S3. BMI, body mass index; HCC, hepatocellular carcinoma, HR, hazard ratio. *P* for non-linearity <0.001 for all analyses.

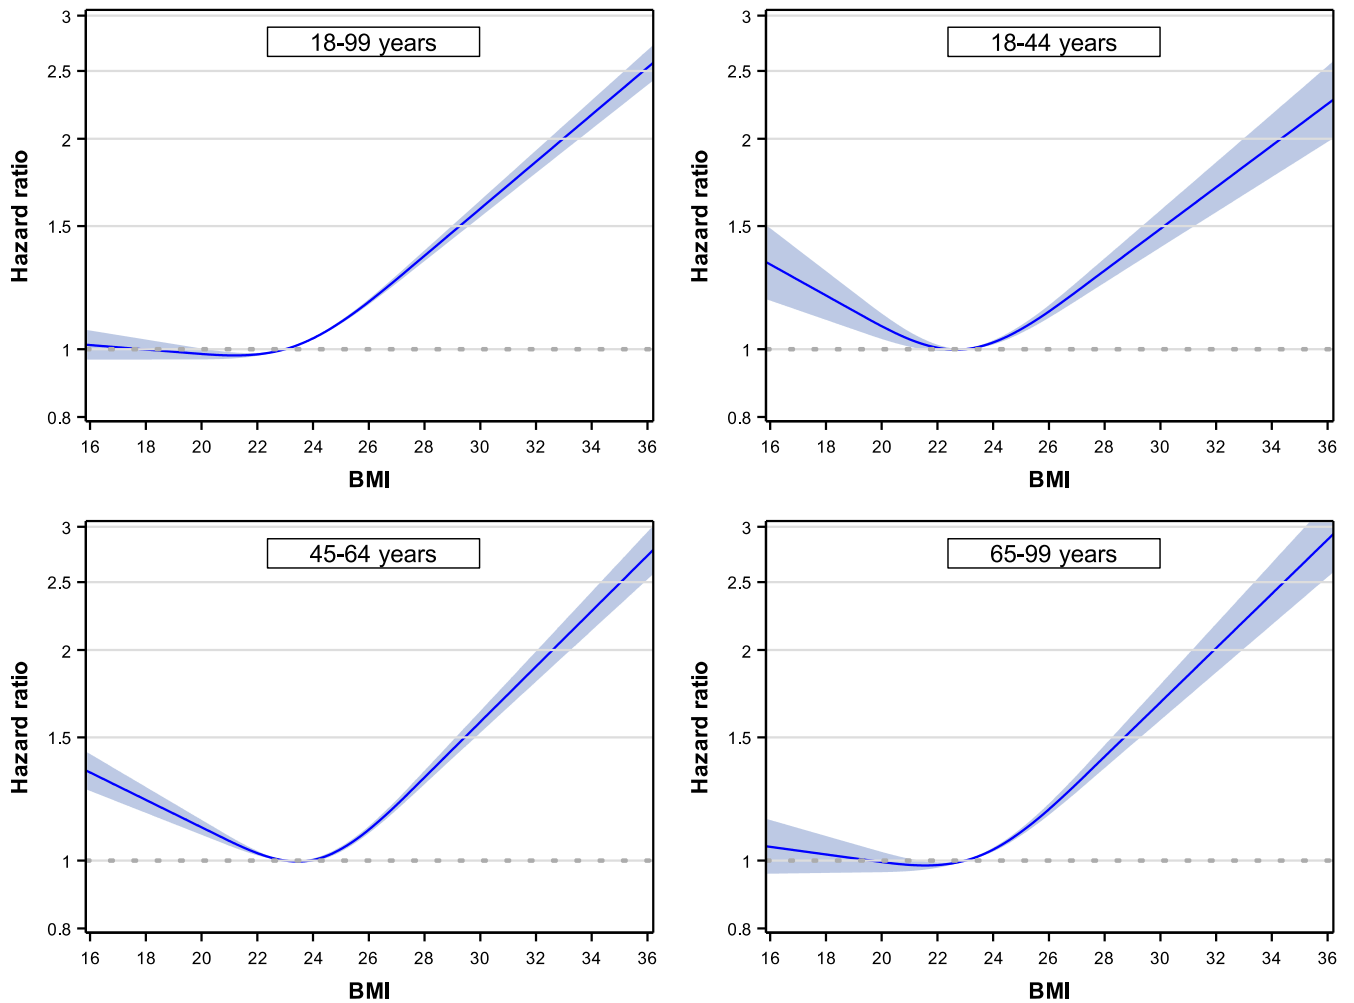

**Figure S6. HRs\* for HCC incidence by age using spline analysis (3 knots).**

Restricted cubic splines of BMI with predefined 3 knots (10th, 50th, and 90th percentile) and 23 kg/m<sup>2</sup> as a reference were used. Hazard ratios and 95% CIs were calculated using Cox proportional hazards models after adjustment for the same variables as in Figure S3. BMI, body mass index; HCC, hepatocellular carcinoma, HR, hazard ratio. *P* for non-linearity <0.001 for all analyses.



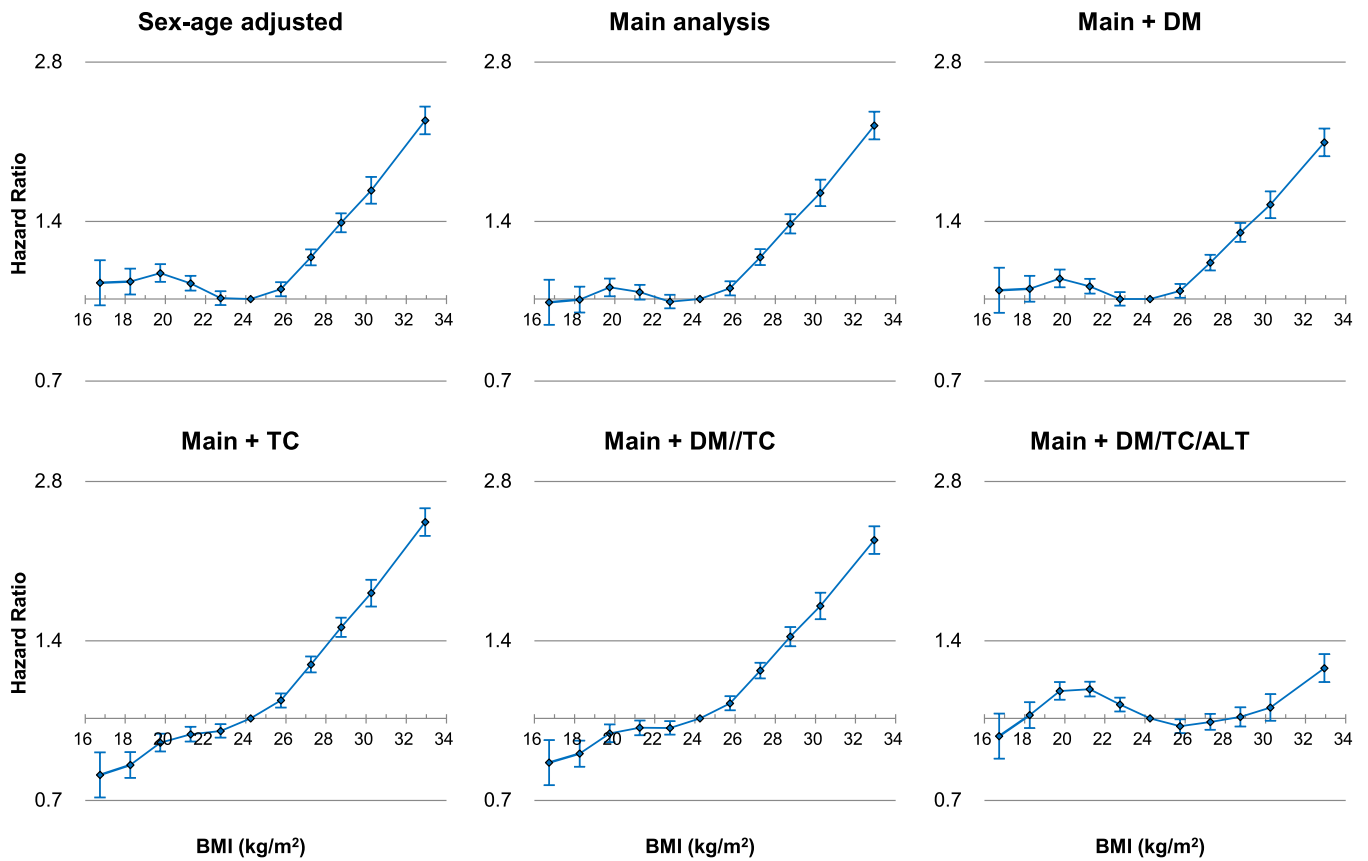

**Figure S7. HRs\* across 11 categories of BMI for HCC incidence according to adjusted variables.**

BMI categories (kg/m<sup>2</sup>, <17.5, 17.5-18.9 to 29.5-30.9 by 1.5, ≥31.0, 23.5-24.9 as reference). The midpoint was used as a representative value of each BMI category, except both ends (16.7 and 32.9) for which the median was used. \*Hazard ratios and 95% confidence intervals were calculated using Cox models. Main analysis included sex, age, household income, smoking status, alcohol use, and physical activity. ALT, log-transformed alanine transaminase; BMI, body mass index; DM, diabetes status; HCC, hepatocellular carcinoma; TC, total cholesterol

### HCC risks per each 5-unit increase in BMI by model

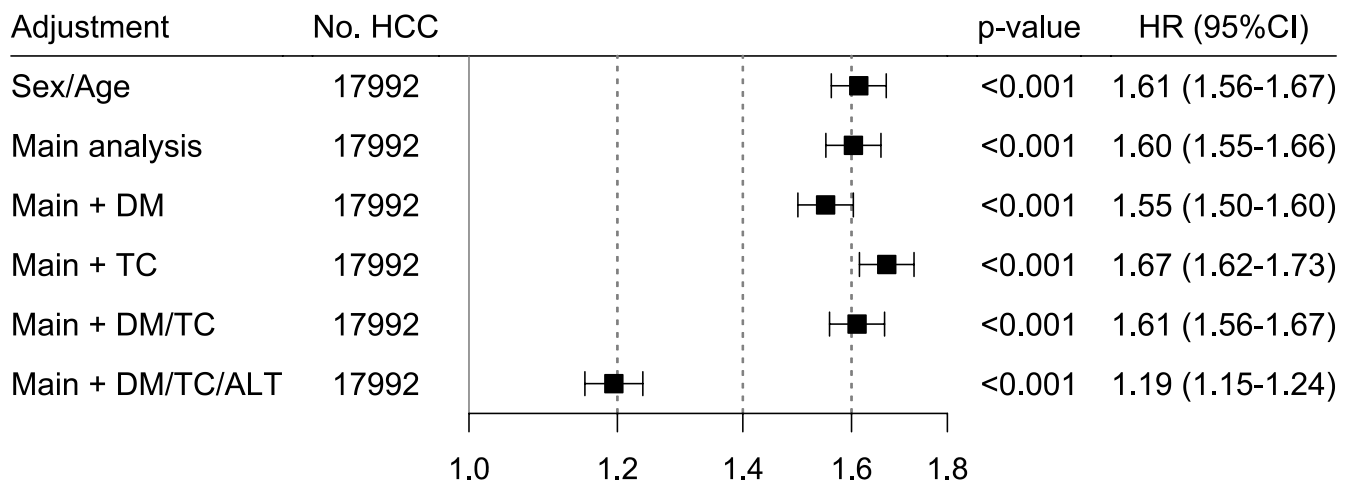

**Figure S8. HRs\* per each 5 kg/m<sup>2</sup> increase in BMI for HCC incidence according to adjusted variables in individuals with BMI ≥25 kg/m<sup>2</sup> (sensitivity analysis).**

\*Hazard ratios and 95% confidence intervals were calculated using Cox models. Main analysis included sex, age, household income, smoking status, alcohol use, and physical activity. ALT, log-transformed alanine transaminase; BMI, body mass index; DM, diabetes status; HCC, hepatocellular carcinoma; TC, total cholesterol.

**Table S1. HRs<sup>a</sup> for HCC incidence across 11 BMI categories (Including numerical version of Figures 1 and S3).**

| Population       | BMI               |            | Crude rate per 10 <sup>6</sup> | Sex, and age adjusted <sup>b</sup> |                  | Multivariable adjusted <sup>c</sup> |                  |
|------------------|-------------------|------------|--------------------------------|------------------------------------|------------------|-------------------------------------|------------------|
|                  | kg/m <sup>2</sup> | No. of HCC |                                | P-value                            | HR (95% CI)      | P-value                             | HR (95% CI)      |
| All participants | <17.5             | 421        | 149                            | 0.157                              | 1.07 (0.97-1.18) | 0.771                               | 0.99 (0.89-1.09) |
|                  | 17.5-18.9         | 1,417      | 144                            | 0.008                              | 1.08 (1.02-1.14) | 0.919                               | 1.00 (0.94-1.05) |
|                  | 19.0-20.4         | 3,686      | 177                            | <0.001                             | 1.12 (1.08-1.16) | 0.010                               | 1.05 (1.01-1.09) |
|                  | 20.5-21.9         | 6,386      | 206                            | <0.001                             | 1.07 (1.04-1.10) | 0.073                               | 1.03 (1.00-1.06) |
|                  | 22.0-23.4         | 8,245      | 227                            | 0.800                              | 1.00 (0.97-1.03) | 0.443                               | 0.99 (0.96-1.02) |
|                  | 23.5-24.9         | 9,161      | 255                            |                                    | 1.00 (Reference) |                                     | 1.00 (Reference) |
|                  | 25.0-26.4         | 7,420      | 277                            | 0.007                              | 1.04 (1.01-1.08) | 0.003                               | 1.05 (1.02-1.08) |
|                  | 26.5-27.9         | 5,104      | 313                            | <0.001                             | 1.20 (1.16-1.24) | <0.001                              | 1.20 (1.16-1.24) |
|                  | 28.0-29.4         | 2,946      | 336                            | <0.001                             | 1.39 (1.34-1.45) | <0.001                              | 1.39 (1.33-1.44) |
|                  | 29.5-30.9         | 1,315      | 344                            | <0.001                             | 1.60 (1.51-1.70) | <0.001                              | 1.59 (1.50-1.68) |
|                  | ≥31.0             | 1,207      | 378                            | <0.001                             | 2.17 (2.04-2.31) | <0.001                              | 2.13 (2.00-2.26) |
| Men              | <17.5             | 331        | 408                            | 0.066                              | 1.11 (0.99-1.24) | 0.913                               | 1.01 (0.90-1.12) |
|                  | 17.5-18.9         | 1,165      | 346                            | <0.001                             | 1.13 (1.07-1.21) | 0.302                               | 1.03 (0.97-1.10) |
|                  | 19.0-20.4         | 3,063      | 350                            | <0.001                             | 1.17 (1.12-1.22) | <0.001                              | 1.09 (1.04-1.14) |
|                  | 20.5-21.9         | 5,227      | 345                            | <0.001                             | 1.10 (1.06-1.14) | 0.008                               | 1.05 (1.01-1.09) |
|                  | 22.0-23.4         | 6,731      | 339                            | 0.311                              | 1.02 (0.98-1.05) | 0.906                               | 1.00 (0.97-1.03) |
|                  | 23.5-24.9         | 7,577      | 349                            |                                    | 1.00 (Reference) |                                     | 1.00 (Reference) |
|                  | 25.0-26.4         | 6,119      | 360                            | 0.054                              | 1.03 (1.00-1.07) | 0.023                               | 1.04 (1.01-1.08) |
|                  | 26.5-27.9         | 4,081      | 405                            | <0.001                             | 1.18 (1.13-1.22) | <0.001                              | 1.18 (1.14-1.22) |
|                  | 28.0-29.4         | 2,278      | 428                            | <0.001                             | 1.36 (1.29-1.42) | <0.001                              | 1.35 (1.29-1.42) |
|                  | 29.5-30.9         | 967        | 463                            | <0.001                             | 1.60 (1.50-1.71) | <0.001                              | 1.59 (1.48-1.70) |
|                  | ≥31.0             | 767        | 477                            | <0.001                             | 2.07 (1.92-2.23) | <0.001                              | 2.03 (1.89-2.19) |
| Women            | <17.5             | 90         | 45                             | 0.813                              | 0.97 (0.79-1.21) | 0.487                               | 0.93 (0.75-1.15) |
|                  | 17.5-18.9         | 252        | 39                             | 0.174                              | 0.91 (0.80-1.04) | 0.074                               | 0.88 (0.77-1.01) |
|                  | 19.0-20.4         | 623        | 52                             | 0.280                              | 0.95 (0.86-1.04) | 0.149                               | 0.93 (0.85-1.02) |
|                  | 20.5-21.9         | 1,159      | 73                             | 0.807                              | 0.99 (0.92-1.07) | 0.659                               | 0.98 (0.91-1.06) |
|                  | 22.0-23.4         | 1,514      | 92                             | 0.352                              | 0.97 (0.90-1.04) | 0.318                               | 0.96 (0.90-1.04) |
|                  | 23.5-24.9         | 1,584      | 111                            |                                    | 1.00 (Reference) |                                     | 1.00 (Reference) |
|                  | 25.0-26.4         | 1,301      | 133                            | 0.098                              | 1.06 (0.99-1.14) | 0.100                               | 1.06 (0.99-1.14) |
|                  | 26.5-27.9         | 1,023      | 163                            | <0.001                             | 1.25 (1.16-1.36) | <0.001                              | 1.25 (1.16-1.35) |
|                  | 28.0-29.4         | 668        | 195                            | <0.001                             | 1.46 (1.33-1.59) | <0.001                              | 1.45 (1.32-1.59) |
|                  | 29.5-30.9         | 348        | 201                            | <0.001                             | 1.54 (1.38-1.73) | <0.001                              | 1.53 (1.36-1.72) |
|                  | ≥31.0             | 440        | 277                            | <0.001                             | 2.28 (2.05-2.54) | <0.001                              | 2.25 (2.02-2.50) |

BMI, body mass index; CI, confidence interval; HCC, hepatocellular carcinoma; HR, hazard ratio.

<sup>a</sup> HRs were calculated by Cox models after adjustment for risk factors.

<sup>b</sup> Adjustment for age at baseline, and sex

<sup>c</sup> Adjustment for age at baseline, sex, household income, smoking status, alcohol use, and physical activity.

**Table S2. HRs<sup>a</sup> for HCC incidence across 7 BMI categories according to sex and age (Including numerical version of Figure 3).**

| Sex age group                 | BMI               |            | Crude rate per 10 <sup>6</sup> | Sex, and age adjusted <sup>b</sup> |                  | Multivariable adjusted <sup>c</sup> |                  |
|-------------------------------|-------------------|------------|--------------------------------|------------------------------------|------------------|-------------------------------------|------------------|
|                               | kg/m <sup>2</sup> | No. of HCC |                                | P-value                            | HR (95% CI)      | P-value                             | HR (95% CI)      |
| All participants              | <18.5             | 1,212      | 147                            | <0.001                             | 1.10 (1.04-1.17) | 0.525                               | 1.02 (0.96-1.08) |
|                               | 18.5-20.9         | 6,218      | 178                            | <0.001                             | 1.11 (1.08-1.15) | 0.002                               | 1.05 (1.02-1.08) |
|                               | 21.0-22.9         | 9,869      | 217                            | 0.034                              | 1.03 (1.00-1.06) | 0.701                               | 1.01 (0.98-1.03) |
|                               | 23.0-24.9         | 12,017     | 249                            |                                    | 1.00 (Reference) |                                     | 1.00 (Reference) |
|                               | 25.0-27.4         | 11,089     | 284                            | <0.001                             | 1.08 (1.05-1.11) | <0.001                              | 1.09 (1.06-1.12) |
|                               | 27.5-29.9         | 4,862      | 338                            | <0.001                             | 1.38 (1.34-1.43) | <0.001                              | 1.38 (1.33-1.43) |
|                               | ≥30.0             | 2,041      | 368                            | <0.001                             | 1.92 (1.83-2.01) | <0.001                              | 1.89 (1.80-1.98) |
| Participants aged 18-44 years | <18.5             | 205        | 33                             | 0.471                              | 1.05 (0.91-1.22) | 0.903                               | 0.99 (0.86-1.14) |
|                               | 18.5-20.9         | 1,322      | 55                             | <0.001                             | 1.12 (1.05-1.20) | 0.046                               | 1.07 (1.00-1.15) |
|                               | 21.0-22.9         | 1,967      | 78                             | 0.215                              | 1.04 (0.98-1.10) | 0.503                               | 1.02 (0.96-1.09) |
|                               | 23.0-24.9         | 2,218      | 97                             |                                    | 1.00 (Reference) |                                     | 1.00 (Reference) |
|                               | 25.0-27.4         | 2,017      | 116                            | 0.101                              | 1.05 (0.99-1.12) | 0.142                               | 1.05 (0.98-1.11) |
|                               | 27.5-29.9         | 956        | 150                            | <0.001                             | 1.41 (1.31-1.52) | <0.001                              | 1.37 (1.27-1.48) |
|                               | ≥30.0             | 411        | 148                            | <0.001                             | 1.71 (1.54-1.91) | <0.001                              | 1.64 (1.47-1.82) |
| Participants aged 45-64 years | <18.5             | 553        | 453                            | <0.001                             | 1.28 (1.18-1.40) | <0.001                              | 1.16 (1.06-1.26) |
|                               | 18.5-20.9         | 3,254      | 395                            | <0.001                             | 1.21 (1.16-1.26) | <0.001                              | 1.13 (1.08-1.17) |
|                               | 21.0-22.9         | 5,524      | 341                            | 0.006                              | 1.05 (1.01-1.09) | 0.278                               | 1.02 (0.98-1.06) |
|                               | 23.0-24.9         | 7,103      | 344                            |                                    | 1.00 (Reference) |                                     | 1.00 (Reference) |
|                               | 25.0-27.4         | 6,708      | 382                            | <0.001                             | 1.07 (1.04-1.11) | <0.001                              | 1.09 (1.05-1.12) |
|                               | 27.5-29.9         | 2,843      | 442                            | <0.001                             | 1.34 (1.28-1.39) | <0.001                              | 1.34 (1.28-1.40) |
|                               | ≥30.0             | 1,196      | 540                            | <0.001                             | 1.97 (1.85-2.09) | <0.001                              | 1.95 (1.83-2.07) |
| Participants aged ≥65 years   | <18.5             | 454        | 615                            | 0.833                              | 1.01 (0.91-1.12) | 0.445                               | 0.96 (0.87-1.06) |
|                               | 18.5-20.9         | 1,642      | 620                            | 0.935                              | 1.00 (0.94-1.06) | 0.169                               | 0.96 (0.90-1.02) |
|                               | 21.0-22.9         | 2,378      | 595                            | 0.904                              | 1.00 (0.94-1.05) | 0.431                               | 0.98 (0.93-1.03) |
|                               | 23.0-24.9         | 2,696      | 583                            |                                    | 1.00 (Reference) |                                     | 1.00 (Reference) |
|                               | 25.0-27.4         | 2,364      | 594                            | <0.001                             | 1.11 (1.05-1.17) | <0.001                              | 1.11 (1.05-1.18) |
|                               | 27.5-29.9         | 1,063      | 681                            | <0.001                             | 1.45 (1.35-1.55) | <0.001                              | 1.46 (1.36-1.57) |
|                               | ≥30.0             | 434        | 780                            | <0.001                             | 1.96 (1.77-2.17) | <0.001                              | 1.97 (1.78-2.18) |
| Men                           | <18.5             | 985        | 377                            | <0.001                             | 1.16 (1.08-1.24) | 0.112                               | 1.06 (0.99-1.13) |
|                               | 18.5-20.9         | 5,129      | 348                            | <0.001                             | 1.16 (1.12-1.20) | <0.001                              | 1.08 (1.05-1.12) |
|                               | 21.0-22.9         | 8,094      | 340                            | <0.001                             | 1.05 (1.02-1.08) | 0.141                               | 1.02 (0.99-1.05) |
|                               | 23.0-24.9         | 9,886      | 347                            |                                    | 1.00 (Reference) |                                     | 1.00 (Reference) |
|                               | 25.0-27.4         | 9,070      | 369                            | <0.001                             | 1.07 (1.04-1.10) | <0.001                              | 1.08 (1.05-1.11) |
|                               | 27.5-29.9         | 3,744      | 438                            | <0.001                             | 1.35 (1.30-1.40) | <0.001                              | 1.35 (1.30-1.40) |
|                               | ≥30.0             | 1,398      | 473                            | <0.001                             | 1.85 (1.75-1.95) | <0.001                              | 1.83 (1.73-1.93) |
| Men aged 18-44 years          | <18.5             | 160        | 96                             | 0.206                              | 1.11 (0.94-1.30) | 0.834                               | 1.02 (0.87-1.20) |
|                               | 18.5-20.9         | 1,086      | 113                            | <0.001                             | 1.17 (1.09-1.26) | 0.011                               | 1.10 (1.02-1.19) |

| Sex age group          | BMI               |            | Crude rate per 10 <sup>6</sup> | Sex, and age adjusted <sup>b</sup> |                  | Multivariable adjusted <sup>c</sup> |                  |
|------------------------|-------------------|------------|--------------------------------|------------------------------------|------------------|-------------------------------------|------------------|
|                        | kg/m <sup>2</sup> | No. of HCC |                                | P-value                            | HR (95% CI)      | P-value                             | HR (95% CI)      |
| Men aged 45-64 years   | 21.0-22.9         | 1,688      | 116                            | 0.160                              | 1.05 (0.98-1.12) | 0.457                               | 1.02 (0.96-1.09) |
|                        | 23.0-24.9         | 2,002      | 124                            |                                    | 1.00 (Reference) |                                     | 1.00 (Reference) |
|                        | 25.0-27.4         | 1,889      | 137                            | 0.088                              | 1.06 (0.99-1.12) | 0.121                               | 1.05 (0.99-1.12) |
|                        | 27.5-29.9         | 891        | 177                            | <0.001                             | 1.41 (1.30-1.53) | <0.001                              | 1.38 (1.27-1.49) |
|                        | ≥30.0             | 386        | 186                            | <0.001                             | 1.77 (1.59-1.98) | <0.001                              | 1.69 (1.52-1.89) |
|                        | <18.5             | 466        | 775                            | <0.001                             | 1.31 (1.19-1.44) | 0.001                               | 1.17 (1.07-1.29) |
|                        | 18.5-20.9         | 2,743      | 724                            | <0.001                             | 1.26 (1.20-1.31) | <0.001                              | 1.16 (1.10-1.21) |
| Men aged ≥65 years     | 21.0-22.9         | 4,592      | 615                            | <0.001                             | 1.08 (1.04-1.12) | 0.040                               | 1.04 (1.00-1.08) |
|                        | 23.0-24.9         | 5,876      | 566                            |                                    | 1.00 (Reference) |                                     | 1.00 (Reference) |
|                        | 25.0-27.4         | 5,555      | 598                            | <0.001                             | 1.06 (1.03-1.10) | <0.001                              | 1.08 (1.04-1.12) |
|                        | 27.5-29.9         | 2,235      | 732                            | <0.001                             | 1.31 (1.25-1.37) | <0.001                              | 1.32 (1.25-1.38) |
|                        | ≥30.0             | 813        | 1,038                          | <0.001                             | 1.88 (1.75-2.02) | <0.001                              | 1.88 (1.74-2.02) |
|                        | <18.5             | 359        | 1,023                          | 0.456                              | 1.04 (0.93-1.17) | 0.838                               | 0.99 (0.88-1.11) |
|                        | 18.5-20.9         | 1,300      | 1,002                          | 0.699                              | 1.01 (0.95-1.09) | 0.349                               | 0.97 (0.90-1.04) |
| Women                  | 21.0-22.9         | 1,814      | 994                            | 0.902                              | 1.00 (0.94-1.07) | 0.561                               | 0.98 (0.92-1.05) |
|                        | 23.0-24.9         | 2,008      | 992                            |                                    | 1.00 (Reference) |                                     | 1.00 (Reference) |
|                        | 25.0-27.4         | 1,626      | 1,085                          | 0.007                              | 1.09 (1.03-1.17) | 0.003                               | 1.11 (1.04-1.18) |
|                        | 27.5-29.9         | 618        | 1,386                          | <0.001                             | 1.40 (1.28-1.53) | <0.001                              | 1.42 (1.29-1.55) |
|                        | ≥30.0             | 199        | 1,911                          | <0.001                             | 1.94 (1.67-2.24) | <0.001                              | 1.95 (1.69-2.26) |
|                        | <18.5             | 227        | 40                             | 0.405                              | 0.94 (0.82-1.08) | 0.165                               | 0.91 (0.79-1.04) |
|                        | 18.5-20.9         | 1,089      | 54                             | 0.385                              | 0.97 (0.90-1.04) | 0.198                               | 0.95 (0.88-1.03) |
| Women aged 18-44 years | 21.0-22.9         | 1,775      | 82                             | 0.194                              | 0.96 (0.90-1.02) | 0.145                               | 0.95 (0.90-1.02) |
|                        | 23.0-24.9         | 2,131      | 108                            |                                    | 1.00 (Reference) |                                     | 1.00 (Reference) |
|                        | 25.0-27.4         | 2,019      | 140                            | <0.001                             | 1.11 (1.04-1.18) | 0.001                               | 1.11 (1.04-1.18) |
|                        | 27.5-29.9         | 1,118      | 192                            | <0.001                             | 1.44 (1.34-1.55) | <0.001                              | 1.44 (1.34-1.54) |
|                        | ≥30.0             | 643        | 248                            | <0.001                             | 2.00 (1.83-2.18) | <0.001                              | 1.97 (1.80-2.15) |
|                        | <18.5             | 45         | 10                             | 0.046                              | 0.71 (0.51-0.99) | 0.066                               | 0.73 (0.53-1.02) |
|                        | 18.5-20.9         | 236        | 16                             | 0.064                              | 0.84 (0.69-1.01) | 0.093                               | 0.85 (0.70-1.03) |
| Women aged 45-64 years | 21.0-22.9         | 279        | 26                             | 0.520                              | 0.94 (0.79-1.13) | 0.578                               | 0.95 (0.80-1.14) |
|                        | 23.0-24.9         | 216        | 32                             |                                    | 1.00 (Reference) |                                     | 1.00 (Reference) |
|                        | 25.0-27.4         | 128        | 35                             | 0.736                              | 1.04 (0.83-1.29) | 0.815                               | 1.03 (0.82-1.28) |
|                        | 27.5-29.9         | 65         | 48                             | 0.009                              | 1.45 (1.10-1.91) | 0.014                               | 1.42 (1.07-1.87) |
|                        | ≥30.0             | 25         | 35                             | 0.444                              | 1.18 (0.78-1.78) | 0.557                               | 1.13 (0.75-1.71) |
| Women aged 45-64 years | <18.5             | 87         | 141                            | 0.105                              | 1.20 (0.96-1.49) | 0.226                               | 1.14 (0.92-1.42) |
|                        | 18.5-20.9         | 511        | 115                            | 0.316                              | 1.05 (0.95-1.17) | 0.454                               | 1.04 (0.94-1.15) |
|                        | 21.0-22.9         | 932        | 107                            | 0.266                              | 0.95 (0.87-1.04) | 0.244                               | 0.95 (0.87-1.04) |
|                        | 23.0-24.9         | 1,227      | 119                            |                                    | 1.00 (Reference) |                                     | 1.00 (Reference) |
|                        | 25.0-27.4         | 1,153      | 139                            | 0.016                              | 1.10 (1.02-1.20) | 0.025                               | 1.10 (1.01-1.19) |

| Sex age group        | BMI               |            | Crude rate per 10 <sup>6</sup> | Sex, and age adjusted <sup>b</sup> |                  | Multivariable adjusted <sup>c</sup> |                  |
|----------------------|-------------------|------------|--------------------------------|------------------------------------|------------------|-------------------------------------|------------------|
|                      | kg/m <sup>2</sup> | No. of HCC |                                | P-value                            | HR (95% CI)      | P-value                             | HR (95% CI)      |
| Women aged ≥65 years | 27.5-29.9         | 608        | 180                            | <0.001                             | 1.39 (1.26-1.53) | <0.001                              | 1.37 (1.24-1.51) |
|                      | ≥30.0             | 383        | 267                            | <0.001                             | 2.10 (1.87-2.35) | <0.001                              | 2.03 (1.81-2.27) |
|                      | <18.5             | 95         | 245                            | 0.336                              | 0.90 (0.73-1.12) | 0.197                               | 0.87 (0.70-1.08) |
|                      | 18.5-20.9         | 342        | 253                            | 0.346                              | 0.94 (0.82-1.07) | 0.242                               | 0.93 (0.81-1.05) |
|                      | 21.0-22.9         | 564        | 260                            | 0.633                              | 0.97 (0.87-1.09) | 0.574                               | 0.97 (0.87-1.08) |
|                      | 23.0-24.9         | 688        | 265                            |                                    | 1.00 (Reference) |                                     | 1.00 (Reference) |
|                      | 25.0-27.4         | 738        | 298                            | 0.022                              | 1.13 (1.02-1.25) | 0.019                               | 1.13 (1.02-1.26) |
|                      | 27.5-29.9         | 445        | 399                            | <0.001                             | 1.52 (1.35-1.71) | <0.001                              | 1.53 (1.36-1.72) |
| ≥30.0                | 235               | 519        | <0.001                         | 1.98 (1.71-2.30)                   | <0.001           | 2.00 (1.72-2.32)                    |                  |

BMI, body mass index; CI, confidence interval; HCC, hepatocellular carcinoma; HR, hazard ratio.

<sup>a</sup> HRs were calculated by Cox models after adjustment for risk factors.

<sup>b</sup> Adjustment for age at baseline, and sex

<sup>c</sup> Adjustment for age at baseline, sex, household income, smoking status, alcohol use, and physical activity.

**Table S3. HRs<sup>a</sup> per each 5 kg/m<sup>2</sup> increase in BMI for HCC incidence by BMI range, age, and sex (including Table 2).**

| Sex group        | Age group, Years | BMI ≥25 kg/m <sup>2</sup> (n=4,284,559) |         |                  |                                       |                                       | BMI <25 kg/m <sup>2</sup> (n=9,981,263) |         |                  |                                       |                                       | BMI full range (n=14,265,822) |         |                  |                                       |                                       |
|------------------|------------------|-----------------------------------------|---------|------------------|---------------------------------------|---------------------------------------|-----------------------------------------|---------|------------------|---------------------------------------|---------------------------------------|-------------------------------|---------|------------------|---------------------------------------|---------------------------------------|
|                  |                  | No. of HCC                              | p-value | HR (95% CI)      | <i>P</i> <sub>interaction (age)</sub> | <i>P</i> <sub>interaction (sex)</sub> | No. of HCC                              | p-value | HR (95% CI)      | <i>P</i> <sub>interaction (age)</sub> | <i>P</i> <sub>interaction (sex)</sub> | No. of death                  | p-value | HR (95% CI)      | <i>P</i> <sub>interaction (age)</sub> | <i>P</i> <sub>interaction (sex)</sub> |
| All participants | 18-99            | 17,992                                  | <0.001  | 1.60 (1.55-1.66) |                                       |                                       | 29,316                                  | 0.013   | 0.96 (0.93-0.99) |                                       |                                       | 47,308                        | <0.001  | 1.21 (1.19-1.22) |                                       |                                       |
|                  | 18-44            | 3,384                                   | <0.001  | 1.56 (1.45-1.68) | 0.610                                 |                                       | 5,712                                   | 0.072   | 0.94 (0.87-1.01) | <0.001                                |                                       | 9,096                         | <0.001  | 1.16 (1.12-1.20) | <0.001                                |                                       |
|                  | 45-64            | 10,747                                  | <0.001  | 1.61 (1.54-1.68) |                                       |                                       | 16,434                                  | <0.001  | 0.90 (0.86-0.94) |                                       |                                       | 27,181                        | <0.001  | 1.17 (1.15-1.20) |                                       |                                       |
|                  | 65-99            | 3,861                                   | <0.001  | 1.64 (1.52-1.76) |                                       |                                       | 7,170                                   | 0.192   | 1.04 (0.98-1.10) |                                       |                                       | 11,031                        | <0.001  | 1.26 (1.22-1.30) |                                       |                                       |
| Men              | 18-99            | 14,212                                  | <0.001  | 1.60 (1.54-1.67) |                                       | 0.853                                 | 24,094                                  | <0.001  | 0.93 (0.90-0.96) |                                       | <0.001                                | 38,306                        | <0.001  | 1.16 (1.14-1.18) |                                       | <0.001                                |
|                  | 18-44            | 3,166                                   | <0.001  | 1.59 (1.47-1.72) | 0.485                                 | 0.085                                 | 4,936                                   | 0.012   | 0.91 (0.84-0.98) | 0.001                                 | 0.001                                 | 8,102                         | <0.001  | 1.17 (1.12-1.21) | 0.007                                 | 0.409                                 |
|                  | 45-64            | 8,603                                   | <0.001  | 1.59 (1.51-1.68) |                                       | 0.591                                 | 13,677                                  | <0.001  | 0.88 (0.84-0.92) |                                       | 0.211                                 | 22,280                        | <0.001  | 1.13 (1.10-1.16) |                                       | <0.001                                |
|                  | 65-99            | 2,443                                   | <0.001  | 1.70 (1.54-1.88) |                                       | 0.322                                 | 5,481                                   | 0.522   | 1.02 (0.96-1.09) |                                       | 0.287                                 | 7,924                         | <0.001  | 1.21 (1.17-1.26) |                                       | 0.001                                 |
| Women            | 18-99            | 3,780                                   | <0.001  | 1.59 (1.50-1.70) |                                       |                                       | 5,222                                   | 0.071   | 1.07 (0.99-1.15) |                                       |                                       | 9,002                         | <0.001  | 1.32 (1.28-1.36) |                                       |                                       |
|                  | 18-44            | 218                                     | 0.118   | 1.24 (0.95-1.63) | 0.166                                 |                                       | 776                                     | 0.012   | 1.28 (1.05-1.55) | 0.016                                 |                                       | 994                           | <0.001  | 1.22 (1.10-1.35) | 0.166                                 |                                       |
|                  | 45-64            | 2,144                                   | <0.001  | 1.63 (1.51-1.77) |                                       |                                       | 2,757                                   | 0.311   | 0.95 (0.85-1.05) |                                       |                                       | 4,901                         | <0.001  | 1.29 (1.24-1.35) |                                       |                                       |
|                  | 65-99            | 1,418                                   | <0.001  | 1.58 (1.42-1.76) |                                       |                                       | 1,689                                   | 0.114   | 1.10 (0.98-1.24) |                                       |                                       | 3,107                         | <0.001  | 1.35 (1.28-1.42) |                                       |                                       |

BMI, body mass index; CI, confidence interval; HCC, hepatocellular carcinoma; HR, hazard ratio.

<sup>a</sup> HRs were calculated by Cox models, after adjustment for age at baseline, sex, household income, smoking status, alcohol use, and physical activity
